# Supplementary material for: GmPRP2 promoter drives root-preferential expression in transgenic Arabidopsis and soybean hairy roots
Source: PubMed Central journal article supplement (PMC4172956; doi:10.1186/s12870-014-0245-z), 2014-09-16

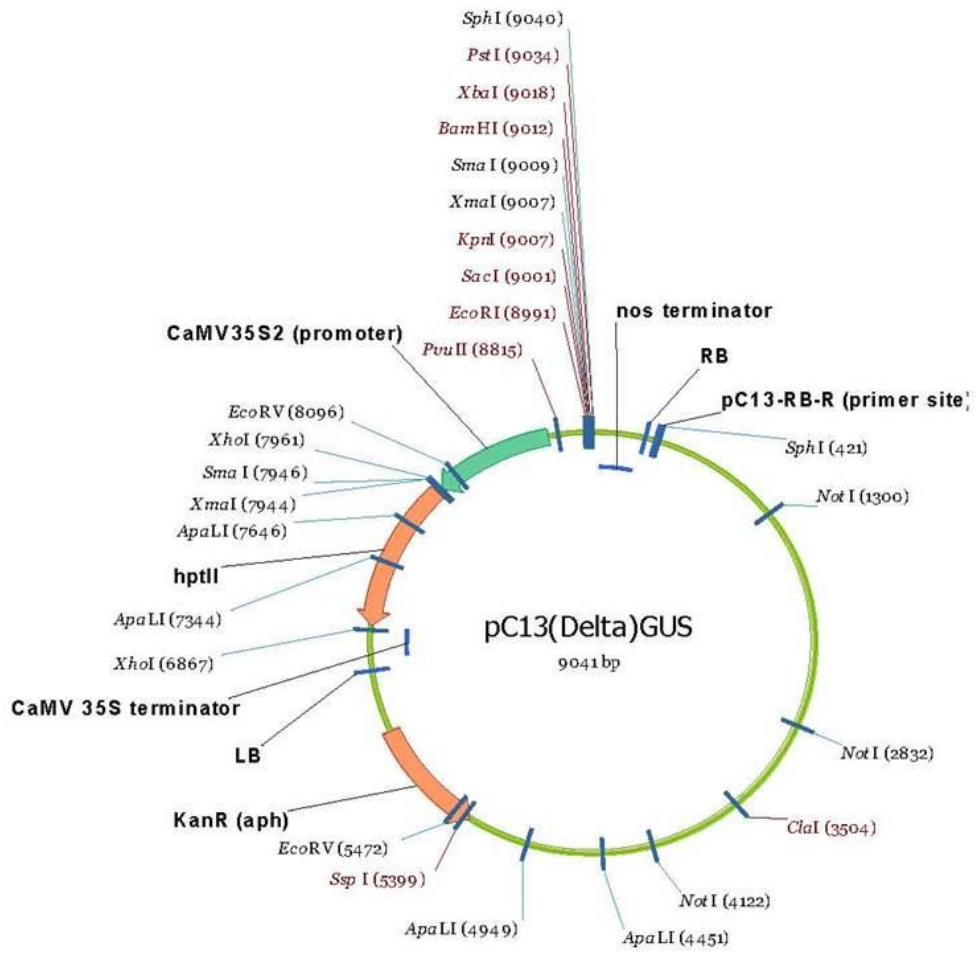

Supplement: 12870_2014_245_MOESM3_ESM.pdf [file 12870_2014_245_MOESM3_ESM.pdf]
